# Supplementary material for: Electrocatalytic stereoselective transformation of aldehydes and two molecules of pyrazolin-5-one into (R*,R*)-bis(spiro-2,4-dihydro-3H-pyrazol-3-one)cyclopropanes
Source: Royal Society of Chemistry journal article supplement (doi:10.1039/c4cy01681e), 2015-01-01

Supporting information for

## **Electrocatalytic Stereoselective Transformation of Aldehydes and Two Molecules of Pyrazolin-5-ones into (*R*\*,*R*\*)-Bis(spiro-2,4-dihydro-3*H*-pyrazol-3-one)cyclopropanes**

M. N. Elinson\*, E. O. Dorofeeva, A. N. Vereshchagin, R. F. Nasybullin and M. P. Egorov

*N. D. Zelinsky Institute of Organic Chemistry, Leninsky prospect 47, 119991 Moscow, Russia*

*E-mail: [elinson@ioc.ac.ru](mailto:elinson@ioc.ac.ru)*

### **1. General Information**

All melting points were measured with a Gallenkamp melting point apparatus and are uncorrected. <sup>1</sup>H and <sup>13</sup>C NMR spectra were recorded with a Bruker Avance II-300 spectrometer at ambient temperature in CDCl<sub>3</sub> solutions. Chemical shifts values are given in δ scale relative to Me<sub>4</sub>Si. IR spectra were registered with a Bruker ALPHA-T FT-IR spectrometer in KBr pellets. High-resolution mass spectrometry (HRMS) (electrospray ionisation, ESI) was measured on a Bruker micrOTOF II instrument; external or internal calibration was done with an Electrospray Calibrant Solution (Fluka). Mass-spectra (EI = 70 eV) were obtained directly with a Finnigan MAT INCOS 50 spectrometer. All starting materials were obtained from commercial sources and used without purification.

### **2. Typical electrolysis procedure**

A solution of 3-methyl-1-phenyl-2-pyrazoline-5-one **4** (10 mmol), aldehyde **3** (5 mmol) and sodium iodide (0.45 g, 3 mmol) in 20 mL of methanol was electrolyzed in an undivided cell equipped with a magnetic stirrer, a graphite anode and an iron cathode at 20 °C under a constant current density of 100 mA cm<sup>-2</sup> (*I* = 500 mA, electrodes square 5 cm<sup>2</sup>) until 2.5 F mol<sup>-1</sup> of electricity was passed (process time 40 min). After the electrolysis was finished, the reaction mixture was gently concentrated to one fifth of initial volume (*ca.* 4 mL) to crystallize the solid product, which was then filtered out, rinsed with an ice-cold methanol (2 × 2 mL), and dried under reduced pressure.

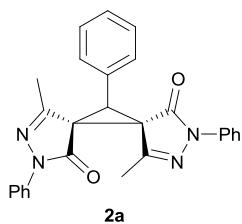

**(5*R*\*,6*R*\*) 4,10-Dimethyl-2,8,11-triphenyl-2,3,8,9-tetraazadispiro**

**[4.0.4.1]undeca-3,9-diene-1,7-dione (2a)** (known compound, see: S. Devi,

A. Nayak and A. S. Mitra, *J. Indian Chem. Soc.*, 1984, **61**, 640): white solid;

yield 1.63 g (75%); mp 166–168 °C; <sup>1</sup>H NMR (300 MHz, CDCl<sub>3</sub>): 2.10 (s,

3 H, CH<sub>3</sub>), 2.45 (s, 3 H, CH<sub>3</sub>), 4.45 (s, 1 H, CH), 7.20–7.27 (m, 4 H, Ph),

7.38–7.49 (m, 7 H, Ph), 7.90 (d, *J* = 8.1 Hz, 2 H, Ph), 7.95 (d, *J* = 8.1 Hz, 2 H, Ph); <sup>13</sup>C NMR (75

MHz, CDCl<sub>3</sub>): 18.2, 20.1, 42.9, 50.1, 51.1, 118.8 (4C), 125.3, 125.4, 127.8, 128.4 (2C), 128.6,

128.7 (2C), 128.8 (2C), 129.7 (2C), 137.6, 137.7, 155.1, 155.8, 165.4, 167.5.

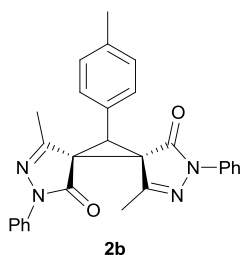

**(5*R*\*,6*R*\*) 11-(4-Methylphenyl)-4,10-dimethyl-2,8-diphenyl-2,3,8,9-**

**tetraazadispiro-[4.0.4.1]undeca-3,9-diene-1,7-dione (2b)** (known

compound, see: M. N. Elinson, A. N. Vereshchagin, E. O. Tretyakova, I. S.

Bushmarinov and G. I. Nikishin *Synthesis*, 2011, 3015): white solid; yield:

1.70 g (76%); mp 135–137 °C; <sup>1</sup>H NMR (300 MHz, CDCl<sub>3</sub>): 2.10 (s, 3 H,

CH<sub>3</sub>), 2.38 (s, 3 H, CH<sub>3</sub>), 2.54 (s, 3 H, CH<sub>3</sub>), 4.40 (s, 1 H, CH), 7.08–7.48

(m, 10 H, Ph), 7.90 (d, *J* = 8.6 Hz, 2 H, Ph), 7.94 (d, *J* = 8.6 Hz, 2 H, Ph); <sup>13</sup>C NMR (75 MHz,

CDCl<sub>3</sub>): 18.2, 20.2, 21.2, 42.9, 50.2, 51.2, 118.8 (4C), 124.8, 125.2, 125.4, 128.7 (2C), 128.8 (2C),

129.2 (2C), 129.6 (2C), 137.7, 137.8, 138.4, 155.2, 155.9, 165.4, 167.6.

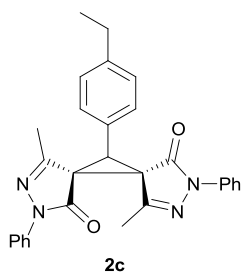

**(5*R*\*,6*R*\*) 11-(4-Ethylphenyl)-4,10-dimethyl-2,8-diphenyl-2,3,8,9-**

**tetraazadispiro-[4.0.4.1]undeca-3,9-diene-1,7-dione (2c)** (known

compound, see: M. N. Elinson, A. N. Vereshchagin, E. O. Tretyakova, I. S.

Bushmarinov and G. I. Nikishin *Synthesis*, 2011, 3015): white solid; yield:

1.85 g (80%); mp 146–148 °C; <sup>1</sup>H NMR (300 MHz, CDCl<sub>3</sub>): 1.27 (t, *J* =

7.5 Hz, 3 H, CH<sub>3</sub>), 2.12 (s, 3 H, CH<sub>3</sub>), 2.55 (s, 3 H, CH<sub>3</sub>), 2.70 (q, *J* = 7.5 Hz,

2 H, CH<sub>2</sub>) 4.43 (s, 1 H, CH), 7.13 (d, *J* = 7.8 Hz, 2 H, Ph), 7.20–7.50 (m, 8 H, Ph), 7.90 (d, *J* =

8.4 Hz, 2 H, Ph), 7.95 (d, *J* = 8.4 Hz, 2 H, Ph); <sup>13</sup>C NMR (75 MHz, CDCl<sub>3</sub>): 15.1, 18.2, 20.1, 28.4,

42.9, 50.2, 51.3, 118.8 (4C), 125.0, 125.2, 125.3, 127.9 (2C), 128.7 (2C), 128.8 (2C), 129.7 (2C),

137.7, 137.8, 144.7, 155.2, 155.8, 165.5, 167.6

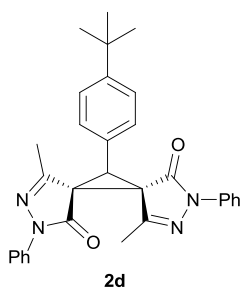

**(5*R*\*,6*R*\*) 11-(4-*t*-Butylphenyl)-4,10-dimethyl-2,8-diphenyl-2,3,8,9-**

**tetraazadispiro-[4.0.4.1]undeca-3,9-diene-1,7-dione (2d):** white solid;

yield: 1.91 g (78%); mp 164–166 °C. <sup>1</sup>H NMR (300 MHz, CDCl<sub>3</sub>): 1.32 (s,

9H, *t*-Bu), 2.08 (s, 3H, CH<sub>3</sub>), 2.53 (s, 3H, CH<sub>3</sub>), 4.39 (s, 1H, CH), 7.17–7.25

(m, 4H, Ar), 7.37–7.46 (m, 6H, Ar), 7.87–7.94 (m, 4H, Ar). <sup>13</sup>C NMR (75

MHz, CDCl<sub>3</sub>): 18.4, 20.3, 31.4 (3C), 34.8, 42.9, 50.4, 51.6, 119.1 (2C), 119.2

(2C), 124.9, 125.4, 125.5, 125.6 (2C), 128.9 (2C), 129.0 (2C), 129.6, 137.8, 137.9, 151.9, 155.5,

156.1, 165.7, 167.9. IR (KBr):  $\nu = 2963, 2866, 1707, 1499, 1394, 1363, 1275, 1129, 754, 687 \text{ cm}^{-1}$ . MS,  $m/z$ , %: 490 ( $M^+$ , 21), 357 (10), 318 (46), 261 (14), 232 (5), 185 (27), 155 (20), 128 (24), 91 (47), 77 (100). HRMS (ESI): 513.2249 [ $M+Na$ ] $^+$ , calcd for  $C_{31}H_{30}N_4NaO_2$ : 513.2261.

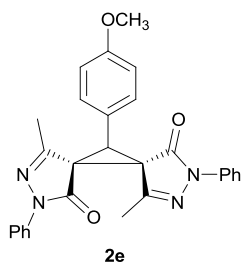

**(5R\*,6R\*) 11-(4-Methoxyphenyl)-4,10-dimethyl-2,8-diphenyl-2,3,8,9-tetraazadi-spiro[4.0.4.1]undeca-3,9-diene-1,7-dione (2e)** (known compound, see: M. N. Elinson, A. N. Vereshchagin, E. O. Tretyakova, I. S. Bushmarinov and G. I. Nikishin *Synthesis*, 2011, 3015): white solid; yield: 1.51 g (65%); mp 145–147 °C;  $^1H$  NMR (300 MHz,  $CDCl_3$ ): 2.10 (s, 3 H,  $CH_3$ ), 2.52 (s, 3 H,  $CH_3$ ), 2.60 (s, 3 H,  $CH_3$ ), 4.10 (s, 1 H, CH), 6.87 (d,  $J = 8.0$  Hz, 1 H, Ph), 6.97 (t,  $J = 7.2$  Hz, 1 H, Ph), 7.10–7.50 (m, 8 H, Ph), 7.86 (d,  $J = 7.8$  Hz, 2 H, Ph), 7.94 (d,  $J = 7.8$  Hz, 2 H, Ph).

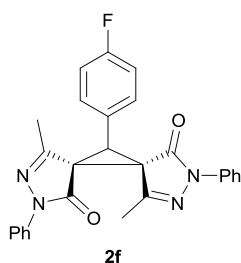

**(5R\*,6R\*) 11-(4-Fluorophenyl)-4,10-dimethyl-2,8-diphenyl-2,3,8,9-tetraazadispiro-[4.0.4.1]undeca-3,9-diene-1,7-dione (2f)**: white solid; yield: 1.54 g (68%); mp 147–149 °C.  $^1H$  NMR (300 MHz,  $CDCl_3$ ): 2.11 (s, 3H,  $CH_3$ ), 2.54 (s, 3H,  $CH_3$ ), 4.40 (s, 1H, CH), 7.06–7.12 (m, 2H, Ar), 7.19–7.28 (m, 4H, Ar), 7.40–7.48 (m, 4H, Ar), 7.88–7.95 (m, 4H, Ar).  $^{13}C$  NMR (75 MHz,  $CDCl_3$ ): 18.3, 20.2, 42.1, 50.1, 51.2, 115.7 (d,  $^2J_{C-F} = 21.9$  Hz, 2C), 118.9 (4C), 123.8 (d,  $^4J_{C-F} = 3.3$  Hz, 1C), 125.4, 125.5, 128.8 (2C), 128.9 (2C), 131.6 (d,  $^3J_{C-F} = 8.3$  Hz, 2C), 137.7, 137.8, 154.8, 155.8, 162.7 (d,  $^1J_{C-F} = 249$  Hz, 1C), 165.4, 167.5. IR (KBr):  $\nu = 2985, 1721, 1711, 1597, 1513, 1500, 1367, 1293, 1130, 759 \text{ cm}^{-1}$ . MS,  $m/z$ , %: 452 ( $M^+$ , 6), 319 (6), 280 (12), 223 (3), 185 (23), 146 (20), 128 (17), 91 (33), 77 (100), 51 (25). HRMS (ESI): 475.1531 [ $M+Na$ ] $^+$ , calcd for  $C_{27}H_{21}FN_4O_2$ : 475.1541.

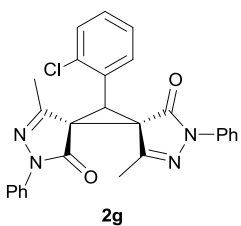

**(5R\*,6R\*) 11-(2-Chlorophenyl)-4,10-dimethyl-2,8-diphenyl-2,3,8,9-tetraazadispiro-[4.0.4.1]undeca-3,9-diene-1,7-dione (2g)** (known compound, see: M. N. Elinson, A. N. Vereshchagin, E. O. Tretyakova, I. S. Bushmarinov and G. I. Nikishin *Synthesis*, 2011, 3015): yellowish solid; yield: 1.76 g (75%); mp 169–171 °C;  $^1H$  NMR (300 MHz,  $CDCl_3$ ): 2.15 (s, 3 H,  $CH_3$ ), 2.55 (s, 3 H,  $CH_3$ ), 4.25 (s, 1 H, CH), 7.20–7.50 (m, 10 H, Ph), 7.85 (d,  $J = 8.1$  Hz, 2 H, Ph), 7.94 (d,  $J = 8.1$  Hz, 2 H, Ph);  $^{13}C$  NMR (75 MHz,  $CDCl_3$ ): 18.1, 20.1, 41.6, 50.3, 50.7, 118.9 (2C), 119.1 (2C), 125.4, 125.5, 126.5 (2C), 128.8 (2C), 128.9 (2C), 129.7, 130.0, 131.7, 135.1, 137.7, 137.8, 154.8, 155.6, 165.4, 167.3.

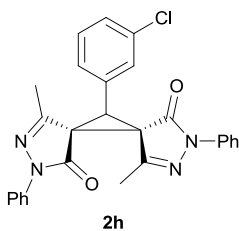

**(5R\*,6R\*) 11-(3-Chlorophenyl)-4,10-dimethyl-2,8-diphenyl-2,3,8,9-tetraazadispiro-[4.0.4.1]undeca-3,9-diene-1,7-dione (2h)** (known compound, see: M. N. Elinson, A. N. Vereshchagin, E. O. Tretyakova, I. S. Bushmarinov and G. I. Nikishin *Synthesis*, 2011, 3015): yellowish solid; yield: 1.64 g (70%); mp 157–158 °C; <sup>1</sup>H NMR (300 MHz, CDCl<sub>3</sub>): 2.13 (s, 3 H, CH<sub>3</sub>), 2.52 (s, 3 H, CH<sub>3</sub>), 4.39 (s, 1 H, CH), 7.10 (d, *J* = 6.9 Hz, 1 H, Ph), 7.20–7.45 (m, 9 H, Ph), 7.89 (d, *J* = 7.8 Hz, 2 H, Ph), 7.95 (d, *J* = 7.8 Hz, 2 H, Ph); <sup>13</sup>C NMR (75 MHz, CDCl<sub>3</sub>): 18.2, 20.1, 42.0, 49.8, 50.8, 118.8 (4C), 125.4, 125.5, 128.0, 128.8 (4C), 128.9, 129.7, 129.8, 130.0, 134.3, 137.6, 137.7, 154.5, 155.5, 165.1, 167.2.

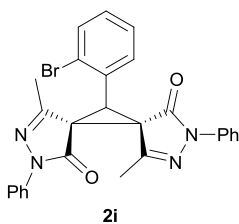

**(5R\*,6R\*) 11-(2-Bromophenyl)-4,10-dimethyl-2,8-diphenyl-2,3,8,9-tetraazadispiro-[4.0.4.1]undeca-3,9-diene-1,7-dione (2i)** (known compound, see: M. N. Elinson, A. N. Vereshchagin, E. O. Tretyakova, I. S. Bushmarinov and G. I. Nikishin *Synthesis*, 2011, 3015): white solid; yield: 1.95 g (76%); mp 154–155°C; <sup>1</sup>H NMR (300 MHz, CDCl<sub>3</sub>): 2.13 (s, 3 H, CH<sub>3</sub>), 2.51 (s, 3 H, CH<sub>3</sub>), 4.38 (s, 1 H, CH), 7.13–7.53 (m, 10 H, Ph), 7.87 (d, *J* = 7.9 Hz, 2 H, Ph), 7.93 (d, *J* = 7.9 Hz, 2 H, Ph);

/FEDU ET\_117

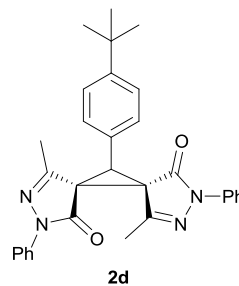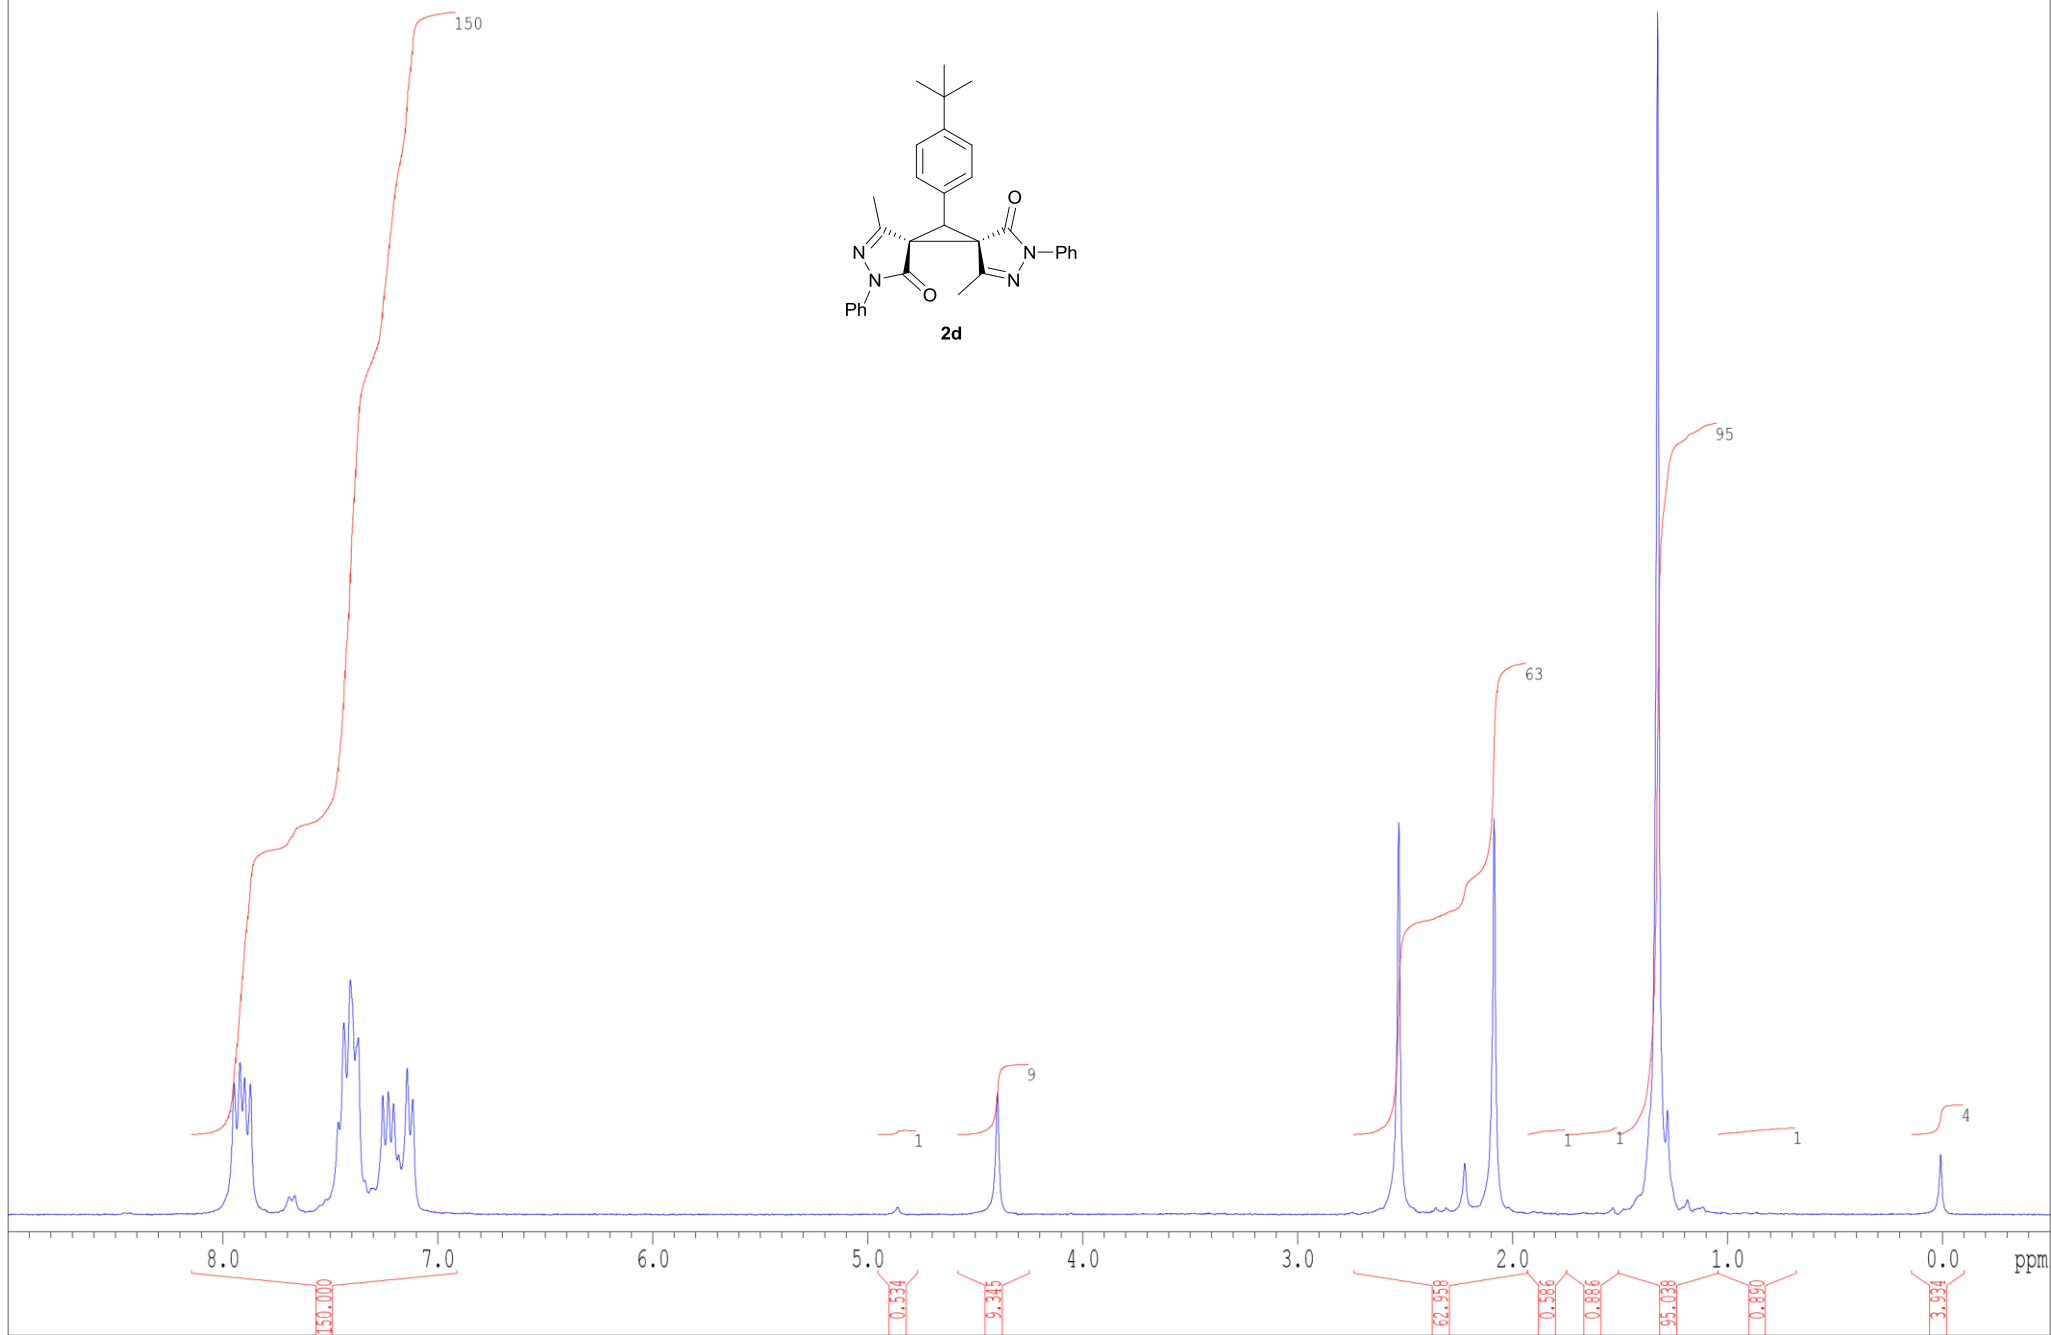

The Best Applied NMR!

# /FEDU ET\_117.C

167.86  
165.74

156.13  
155.47  
151.90

137.93  
137.88  
129.61  
129.04  
128.97  
125.61  
125.52  
124.88  
119.16  
119.05

77.52  
77.30  
77.10  
76.68

51.57  
50.41

42.92

34.77  
31.36

20.29  
18.39

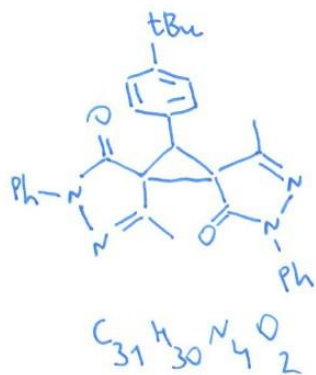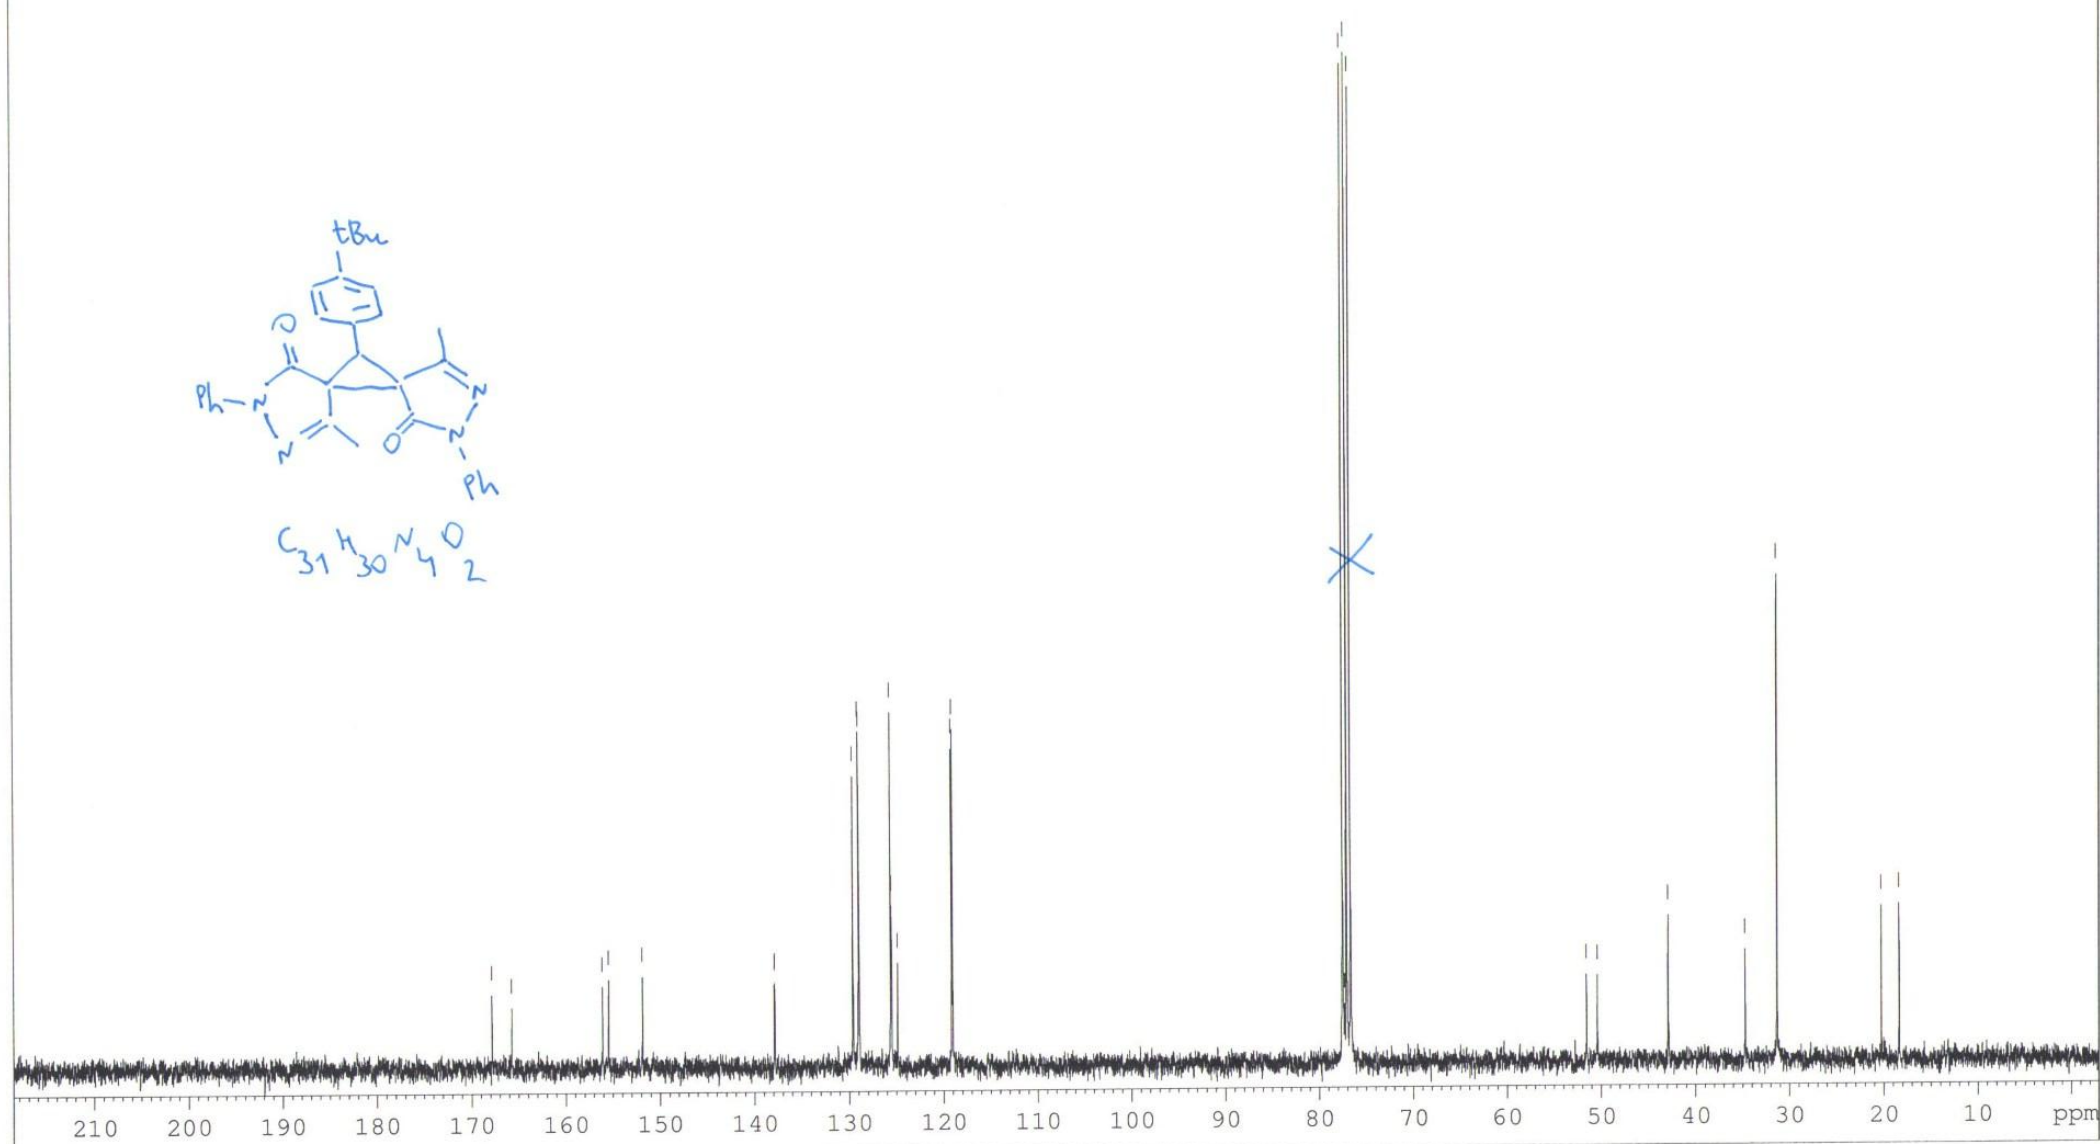

/FEDU GS-241

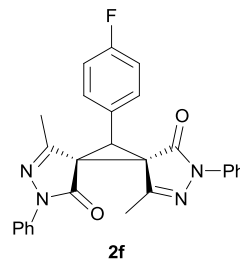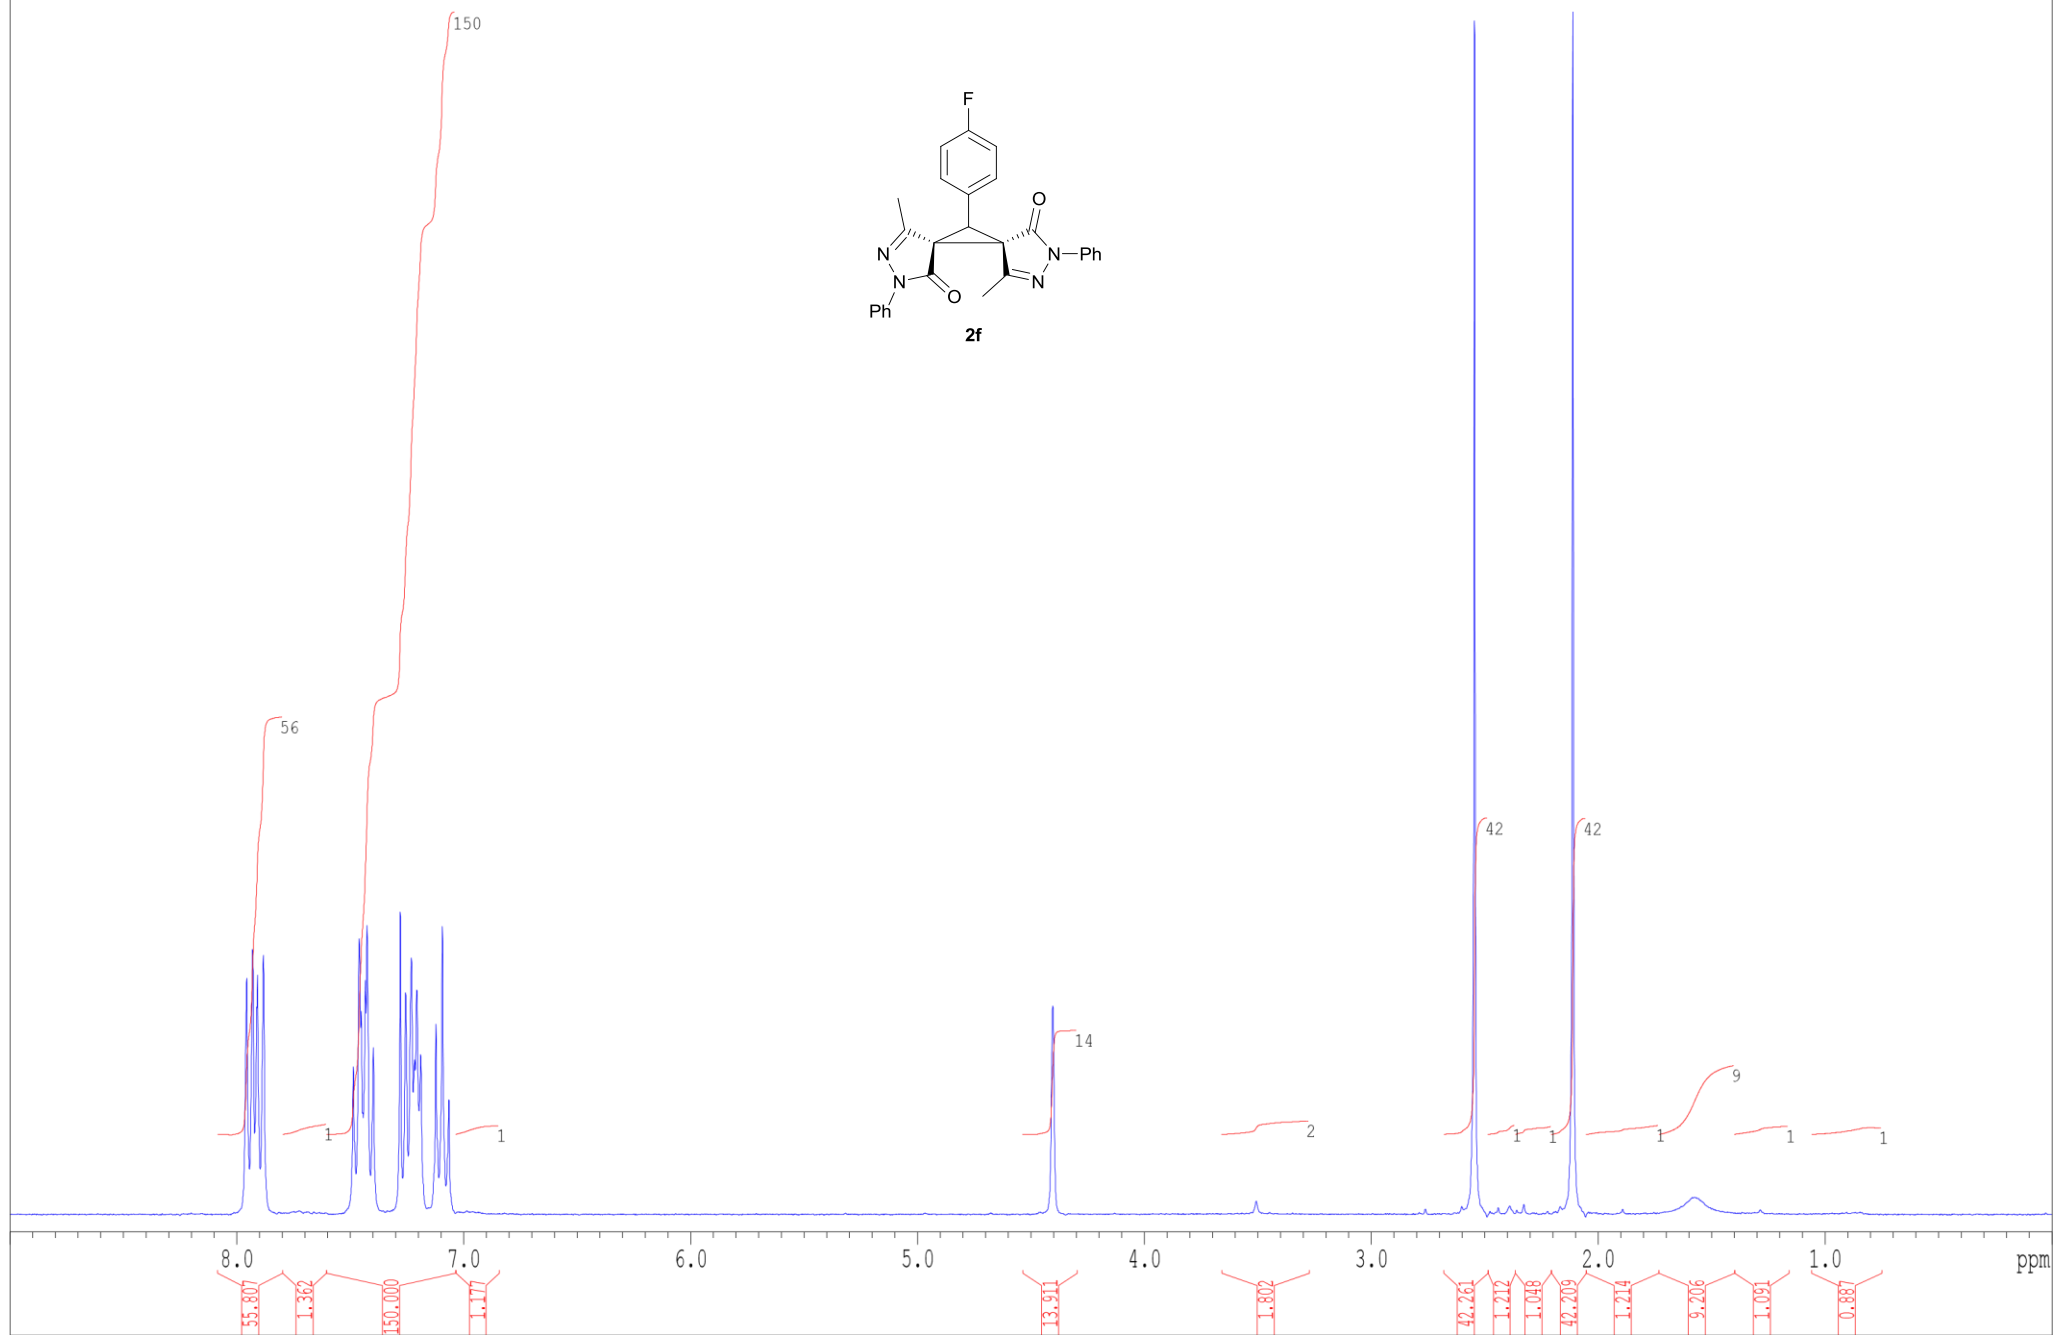

/FEDU GS-241

The Best Applied NMR. Printed Nov 27 2009 21:56

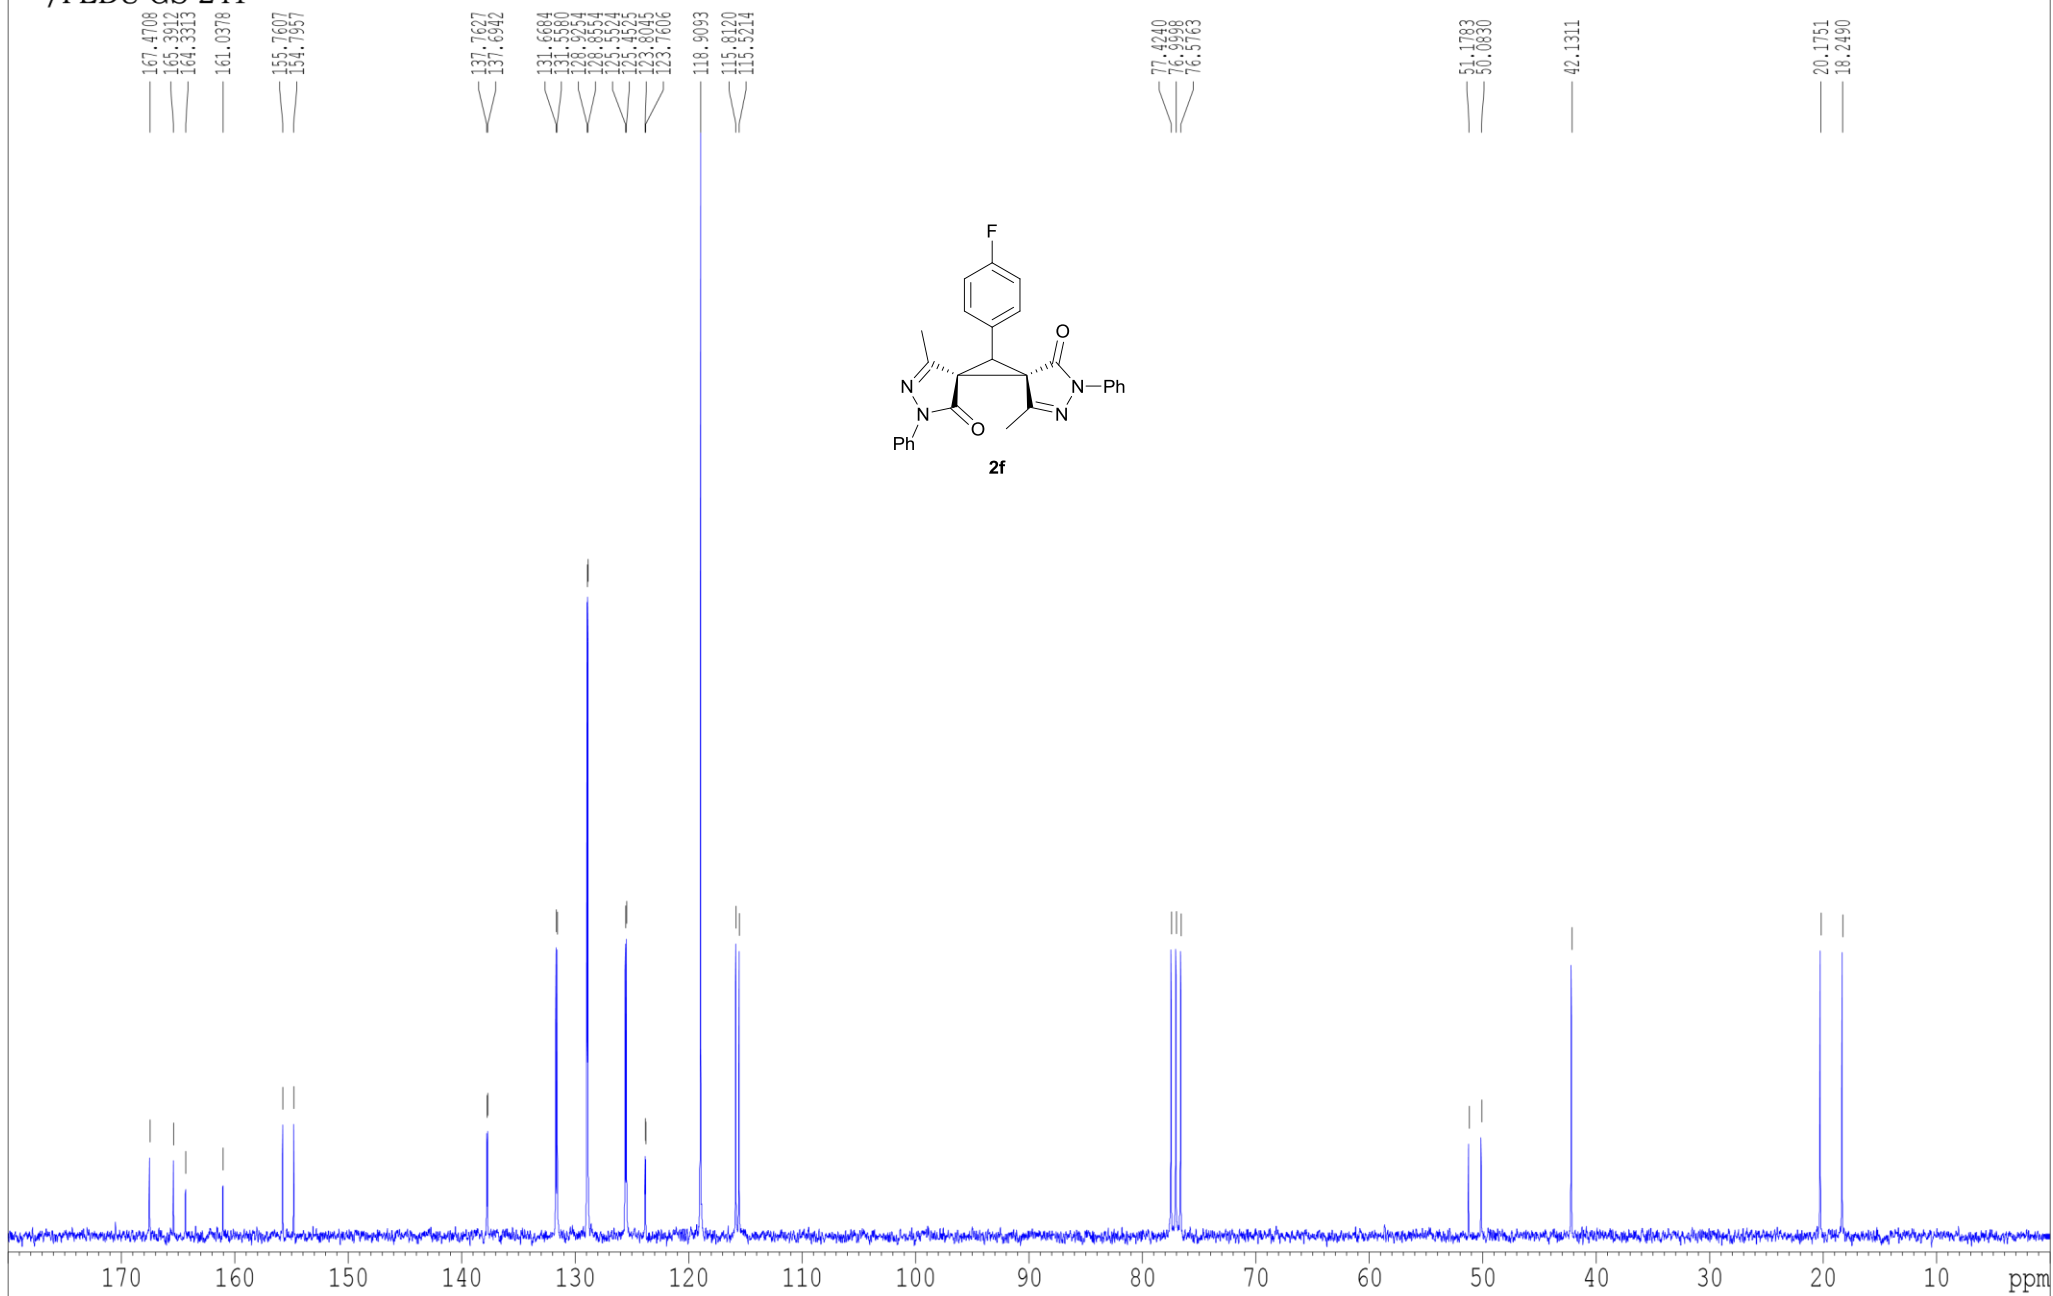

Supplement: c4cy01681e1.pdf [file c4cy01681e1.pdf]
